# Supplementary material for: Power generation for wearable systems
Source: Royal Society of Chemistry journal article supplement (doi:10.1039/d0ee03911j), 2021-01-01
Supplement: d0ee03911j1.pdf [file d0ee03911j1.pdf]

## Supporting Information

### Power generation for wearable systems

Mingyuan Gao, Ping Wang, Lili Jiang, Bowen Wang, Ye Yao, Sheng Liu, Dewei Chu, Wenlong Cheng, and Yuerui Lu\*

**Table S1.** Summary and comparison of various electrostatic energy generator.

| Generator Type               | Electret Materials | Generator volume [mm <sup>3</sup> ] | Proof Mass [g] | Input Amplitude [mm] | Input Frequency [Hz] | $Z_{p-p}/Z_{max}$ [mm] | Power [μW] | Theory Maximum Power [μW] | Effectiveness [%] | Volume Figure of Merit [%] | Reference |
|------------------------------|--------------------|-------------------------------------|----------------|----------------------|----------------------|------------------------|------------|---------------------------|-------------------|----------------------------|-----------|
| In-plane Overlapping Varying | CYTOP              | 18.5×16.5×1                         | 0.4            | 0.15                 | 40-70/1g             | 1.8 ( $Z_{p-p}$ )      | 4.0        | 427.98                    | 0.935             | 0.06786                    | 159       |
| In-plane Overlapping Varying | SiO <sub>2</sub>   | 20×45×2.5                           | 6              | 25                   | 2/0.4g               | 15                     | 40         | 2232                      | 1.79              | 2.27                       | 160       |
| In-plane Overlapping Varying |                    | 20×20×4                             | 3.7            | 0.0416               | 30/0.15g             | 2 ( $Z_{p-p}$ )        | 100        | 514.64                    | 19.43             | 1.59                       | 161       |
| In-plane Overlapping Varying | No Electrets       | 11×6.5×0.86                         | 0.0461         | 0.001                | 250/0.25g            | 0.1 ( $Z_{p-p}$ )      | 0.061      | 4.46                      | 1.367             | 5.38E-03                   | 162       |
| In-plane Overlapping Varying | CYTOP EGG          | ∅39×3.3                             |                |                      | 1-2 rps              |                        | 80         |                           |                   |                            | 163       |
| In-plane Overlapping Varying | Parylene HT        | 50000                               | 0.3564         | 0.1                  | 50                   | 1 ( $Z_{p-p}$ )        | 17.98      | 275.85                    | 6.52              | 2.61E-04                   | 164       |
| Finger-tapping               | Parylene C         | π×7 <sup>2</sup> ×2                 |                | 18.5 cm/s            |                      |                        | 312.7      |                           |                   |                            | 165       |
| In-plane Overlapping Varying | CYTOP              | 200                                 | 0.061          | 4.7nm                | 368.5-376.45         | 0.008 ( $Z_{max}$ )    | 0.2nW      | 0.0144                    | 1.39              | 2.4E-04                    | 166       |
| In-plane Gap Closing         | No Electrets       | 4×5×0.025                           | 0.00092        | 0.000294             | 712/0.6g             | 0.0055 ( $Z_{max}$ )   | 17nW       | 0.0847                    |                   | 2.911                      | 167       |

|                          |                       |         |          |         |                     |  |                      |          |        |       |           |     |
|--------------------------|-----------------------|---------|----------|---------|---------------------|--|----------------------|----------|--------|-------|-----------|-----|
| Finger-tapping           | PVDF/PTFD, Parylene C | 25×25×2 |          |         | 10                  |  | 1-2 ( $Z_{max}$ )    | 45.6     |        |       |           | 168 |
| In-plane Overlap Varying | No Electrets          | 200     | 0.000642 | 0.0015  | 1300-1500(1460)/13g |  | 0.02 ( $Z_{max}$ )   | 3.5/1.58 | 7.42   | 21.29 | 9.69 E-05 | 169 |
| Out-of-plane Gap Closing | Teflon                | 32×9×10 | 3        | 0.0247  | 45/0.2g             |  | 0.046 ( $Z_{p-p}$ )  | 17       | 19.232 | 88.39 | 0.0617    | 170 |
| In-plane Gap Closing     | No Electret           |         | 4        | 0.004   | 120/0.23g           |  | 0.0254 ( $Z_{max}$ ) | 1.2      | 86.965 | 1.38  |           | 171 |
| In-plane Overlap Varying | No Electret           | 39.375  | 0.0079   | 0.01574 | 63/0.25g            |  | 0.0036               | 0.39     |        |       |           | 172 |
| In-plane Overlap Varying | No Electret           | 1000    |          | 25      | 1.5                 |  |                      | 0.3      |        |       |           | 173 |

**Table S2.** Summary of comparison of various electromagnetic energy generator.

| Generator Type              | Generator volume [mm <sup>3</sup> ] | Pro of Mass [g] | Input Amplitude [mm] | Input Frequency [Hz] | $Z_{p-p}/Z_{max}$ [mm] | Number of coils | Output Voltage [V]  | Power [μW] | Theory Maximum Power [μW] | Efficiency [%] | Volume Figure of Merit [%] | Reference |
|-----------------------------|-------------------------------------|-----------------|----------------------|----------------------|------------------------|-----------------|---------------------|------------|---------------------------|----------------|----------------------------|-----------|
| Cantilever-resonant         | 8000                                | 0.58            | 0.0147               | 130/1.0g             |                        | 2100            | 1                   | 422        |                           | 55.5           | 0.027                      | 217       |
| Diaphragm-resonant          | 600                                 | 0.0465          | 0.0488               | 54/0.57g             | 4 ( $Z_{max}$ )        | 183             | 0.0682              | 115.1      | 176.96                    | 65.03          | 0.991                      | 218       |
| Non-resonant                | 1700                                | 0.21            | 0.2968               | 40-80/1.9g           | 2 ( $Z_{max}$ )        | 10×12           | 0.009 ( $V_{max}$ ) | 0.4        | 987.97                    | 0.0405         | 3.47 E-04                  | 219       |
| Tunable Cantilever-resonant | 2400                                | 2.4             | 0.00328              | 67.6-98/0.06g        | 1.2 ( $Z_{p-p}$ )      | 6950            | 8.1                 | 61.6       | 180.14                    | 34.09          | 0.633                      | 220       |
| Pendulum-resonant           | 100878 (46×43×51)                   | 120             | 0.04325              | 17/0.05g             | 5 ( $Z_{max}$ )        | 1500            | 1.5 ( $V_{max}$ )   | 5000       | 15788.22                  | 31.67          | 1.677                      | 221       |
| Hybrid Up-conversion        | 148.75 (8.5×7×2.5)                  | 0.16            | 0.44-2               | 70-150 (113)         | 0.2 ( $Z_{max}$ )      | 6               | 0.57 E-03           | 0.25 E-03  | 2515.86                   | 1.987 E-04     | 3.34 E-06                  | 222       |
| Hybrid Up-conversion        | 456                                 | 1.6             | 0.001                | 3400                 | 0.15 ( $Z_{max}$ )     | 16              | 0.67 E-03           | 56pW       |                           |                |                            | 223       |
| Diaphragm-                  | 130                                 | 0.0312          | 0.125                | 55/1.5g              | 0.2591 ( $Z_{max}$ )   | 60              | 0.018 ( $V_{pp}$ )  | 0.61       | 20.819                    | 2.93           | 0.0149                     | 224       |

|                                              |                          |           |              |                  |                        |          |                               |              |          |              |                   |     |
|----------------------------------------------|--------------------------|-----------|--------------|------------------|------------------------|----------|-------------------------------|--------------|----------|--------------|-------------------|-----|
| resonant<br>Translat<br>ion-<br>resonan<br>t | 8586                     | 7         | 16           | 5/               | 50<br>( $Z_{max}$ )    | 500      | 0.1-<br>0.25                  | 300          | 86685.6  | 3.46         | 2.86              | 225 |
| Hybrid<br>Cantilev<br>er-<br>resonan<br>t    | 93750<br>(25×30×<br>125) | 17.6      | 21.88        | 20/35g           | 10<br>( $Z_{p-p}$ )    | 500      |                               | 0.25<br>W    | 1.90752W | 13.1<br>06   | 0.11<br>2         | 226 |
| Beam-<br>resonan<br>t                        | 3375                     | 0.26      | 0.014        | 938              | 0.4<br>( $Z_{max}$ )   | 20×<br>2 | 1E-04                         | 3.2          | 148805   | 2.15<br>E-03 | 1.83<br>E-06      | 227 |
| Tunable<br>Cantilev<br>er-<br>resonan<br>t   | 150/117<br>60            | 1.02      | 0.0056<br>4  | 52/0.06<br>1g    | 0.85<br>( $Z_{max}$ )  | 280<br>0 | 1.141<br>( $V_{rms}$ )        | 58           | 85.144   | 68.1<br>2    | 30.7<br>16        | 228 |
| Hybrid<br>Stroke-<br>non-<br>resonan<br>t    | 141.3<br>(Ø6×5)          | 0.26      | 2            | 3-8              | 2<br>( $Z_{max}$ )     | 300      | 0.0122                        | 1.15         | 65.94    | 1.74         | 0.51              | 229 |
| Translat<br>ion-<br>resonan<br>t             | 12700                    | 27        | 0.15         | 8/0.038<br>5g    | 4-8<br>( $Z_{max}$ )   | 100<br>0 | 2<br>( $V_{max}$ )            | 300          | 1027.15  | 29.2         | 4.41              | 230 |
| Cantilev<br>er-<br>resonan<br>t              | 150                      | 0.54      | 0.0621<br>5  | 60/0.89<br>5g    | 1.5<br>( $Z_{max}$ )   | 65       | 0.0235<br>( $V_{pp}$ )        | 0.58<br>4    | 1346.57  | 0.04<br>34   | 0.01<br>83        | 231 |
| Cantilev<br>er-<br>resonan<br>t              | 150                      | 0.66      | 0.0055<br>4  | 52/0.06<br>g     | 1.52<br>( $Z_{max}$ )  | 230<br>0 | 0.428<br>( $V_{rms}$ )        | 46           | 96.773   | 47.5<br>3    | 24.8              | 232 |
| Translat<br>ion-<br>resonan<br>t             | 500/304<br>00            | 1.37      |              | 5-15             | 1.8<br>( $Z_{max}$ )   | 925<br>0 | 2<br>( $V_{max}$ )            | 35           |          |              |                   | 233 |
| Swing-<br>resonan<br>t                       | 56422<br>(Ø25×11<br>5)   | 91.5      | 0.007        | 39.5/0.<br>0435g | 0.35<br>( $Z_{max}$ )  | 476<br>0 |                               | 320          | 1710.91  | 18.7         | 0.11<br>5         | 234 |
| Up-<br>convers<br>ion                        | 68000                    | 159.<br>1 | 3.4376       | 2/0.055<br>g     | 10<br>( $Z_{max}$ )    |          | 0.2<br>( $V_{max}$ )          | 57/2<br>.3   | 5418.32  | 1.05<br>2    | 0.25              | 235 |
| Rotatin<br>g-non-<br>resonan<br>t            | 2000                     | 3.2       | 3.75         | 10/1.5g          |                        | 4        | 0.137<br>( $V_{rms}$ )        | 117          |          |              | 0.41<br>4         | 236 |
| Diaphra<br>gm-<br>resonan<br>t               | 648                      | 0.21      | 0.015        | 390/9g           | 0.1<br>( $Z_{max}$ )   | 300      | 0.07<br>( $V_{max}$ )         | 5            | 2313.95  | 0.21<br>6    | 3.35<br>E-04      | 237 |
| Diaphra<br>gm-<br>resonan<br>t               | 14.3                     | 0.05<br>5 | 0.0008<br>9  | 530/1g           | 0.01<br>( $Z_{max}$ )  | 3        | 13.2E-<br>06<br>( $V_{rms}$ ) | 23p<br>W     | 9.025    | 2.55<br>E-04 | 1.67<br>4E-<br>06 | 238 |
| Up-<br>convers<br>ion                        | 3680                     | 9.63      | 2.5          | 10/1g            | 2<br>( $Z_{max}$ )     | 200<br>0 | 0.1<br>( $V_{max}$ )          | 558/<br>39.5 | 5962.73  | 9.35<br>8    | 1.31<br>5         | 239 |
| Hybrid<br>Beam-<br>resonan<br>t              |                          | 0.83<br>6 | 0.0004<br>63 | 753/1.0<br>5g    | 0.035<br>( $Z_{max}$ ) | 750      |                               | 30           | 716.29   | 4.18<br>8    |                   | 240 |
| Diaphra<br>gm-<br>resonan<br>t               | 410                      | 5.4       | 0.0854       | 24.2/0.<br>2g    | 1<br>( $Z_{max}$ )     | 741      | 2E-03<br>( $V_{max}$ )        | 144          | 809.369  | 17.7<br>9    | 13.0<br>75        | 241 |

**Table S3.** Summary of comparison of various piezoelectric energy generator.

| Generator volume [cm <sup>3</sup> ] | Mass [g] | Input amplitude [μm] | Excitation acc. [g] | Frequency [Hz] | Z <sub>1</sub> [μm] | Power [μW] | Power density [μW cm <sup>-3</sup> ] | Effectiveness [EH%] | Merit [FoM <sub>v</sub> %] | Reference |
|-------------------------------------|----------|----------------------|---------------------|----------------|---------------------|------------|--------------------------------------|---------------------|----------------------------|-----------|
| 0.464                               | 2.95     | 8.6                  | 0.2                 | 76             | 395.4               | 14         | 30.17                                | 2.56                | 0.345                      | 258       |
| 1.2                                 | 9        | 2480                 | 1                   | 10             |                     | 3.25       | 2.7                                  |                     | 0.0343                     | 259       |
| 0.0266                              | 0.21     | 7.92                 | 5                   | 400            |                     | 42         | 1579                                 |                     | 0.349                      | 260       |
| 5.44E-04                            | 0.00126  | 0.34                 | 1                   | 853            | 129                 | 0.18       | 38.3                                 | 4.23                | 0.642                      | 261       |
| 5.25E-03                            | 0.024    | 13.7                 | 5                   | 304            | 644.1               | 17         | 3238                                 | 2.30                | 1.618                      | 262       |
| 0.242                               | 2.98     | 45.5                 | 0.75                | 64             | 200                 | 350.9      | 1450                                 | 3.98                | 6.520                      | 263       |
| 19.25E-03                           | 0.00049  | 13.43                | 0.25                | 68             |                     | 0.023      |                                      |                     | 0.035                      | 264       |
| 5.60E-03                            | 0.043    | 7.98                 | 0.5                 | 126            | 1.12E+03            | 5.3        | 946.4                                | 5.57                | 11.158                     | 265       |
| 7.4175E-04                          | 0.16     |                      | 0.16                | 6              |                     | 284        |                                      | 65                  |                            | 266       |
| 1.00E-01                            | 3.17     | 1.375                | 0.2                 | 190            | 2.75E+01            | 49.5       | 495                                  | 48.5                | 3.779                      | 267       |
| 1                                   | 16.8     | 7.5                  | 0.23                | 87             | 300                 | 370        | 268.1                                | 12                  | 2.504                      | 268       |
| 37.32E-03                           | 0.12     | 73.4                 | 3                   | 100.8          |                     | 321        | 8664                                 |                     | 9.303                      | 269       |
| 7.69E-04                            | 0.00142  | 5.5                  | 0.75                | 183.8          | 2193.4              | 0.32       | 416                                  | 1.94                | 4.445                      | 270       |
| 4.25E-04                            | 0.00199  | 9.48                 | 2.5                 | 255.9          |                     | 2.765      | 6513.5                               |                     | 18.233                     | 271       |
| 0.175                               | 1.56     | 5.53                 | 0.26                | 108            | 138.3               | 50         | 285.7                                | 26.8                | 2.451                      | 272       |
| 0.033                               | 0.077    | 4.1                  | 1.75                | 325            | 675                 | 85         | 2500                                 | 9.37                | 1.907                      | 273       |
| 2.45E-04                            | 0.00026  | 0.323                | 0.81                | 792            |                     | 1.3        |                                      |                     | 17.662                     | 274       |
| 4.18E-4                             | 0.00084  | 2.26                 | 1.5                 | 406            |                     | 7.182      | 17181.8                              |                     | 50.765                     | 275       |
| 0.054                               | 1.0422   | 4.4                  | 0.25                | 120            |                     | 145        | 2680                                 |                     | 31.228                     | 276       |
| 0.0127                              | 0.03     | 3.03                 | 2                   | 571            | 895                 | 60         | 4724                                 | 3.19                | 1.120                      | 277       |
| 4.006E-04                           | 0.00289  | 0.94                 | 1.0                 | 514.1          |                     | 11.56      | 28856.7                              |                     | 40.731                     | 278       |
| 6.52E-04                            | 0.00142  | 2.33                 | 2                   | 461.15         | 898                 | 2.15       | 3272                                 | 5.95                | 5.562                      | 279       |
| 5.12E-04                            | 0.00117  | 1.13E-02             | 2                   | 1495           |                     | 0.45       | 878.9                                |                     | 9.725                      | 280       |
| 2.3                                 |          |                      |                     | 3              |                     |            | 8.22                                 |                     |                            | 281       |
| 1.06E-01                            | 0.486    | 8.16E-02             | 1                   | 1744           | 1.85                | 14.7       | 138                                  | 30.4                | 0.023                      | 282       |
| 4.10E-04                            | 3.5      | 50.67                | 1                   | 70             | 2533                | 1          | 2439                                 |                     | 63.135                     | 283       |
| 1.0166                              |          |                      |                     | 3.2            |                     |            | 27.97                                |                     |                            | 284       |
